# Supplementary material for: Cationic charge effect of glutamine repulsion adsorbate on Li metal surfaces for highly stable lithium–sulfur batteries
Source: Royal Society of Chemistry journal article supplement (doi:10.1039/d3dt04122k), 2024-01-01
Supplement: d3dt04122k1.pdf [file d3dt04122k1.pdf]

1

## Supporting Information

### 2 **Cationic charge effect of glutamine repulsion adsorbate of Li-metal** 3 **surfaces for highly stable lithium-sulfur batteries**

4 Chaehyeong Lee<sup>a,b, †</sup>, Jin Won Kim<sup>a,b,c, †</sup>, and Jaeyoung Lee<sup>a,b, c,\*</sup>

5 <sup>a</sup> *School of Earth Sciences and Environmental Engineering,*

6 <sup>b</sup> *International Future Research Center of Chemical Energy Storage and Conversion Processes,*

7 <sup>c</sup> *Ertl Center for Electrochemical and Catalysis, Gwangju Institute of Science and Technology*  
8 *(GIST), 123 Cheomdangwagi-ro, Gwangju, 61005, Republic of Korea*

9 † These authors contributed equally to this work

10 \*Corresponding author.

11 *E-mail address:* jaeyoung@gist.ac.kr (J. Lee)

12

13 **Keywords** : *Lithium-sulfur batteries; Electrolyte additives; Amino-acid material; Adsorbate*

14

15

## 16 **Table of contents**

17 **Figure S1.** Optical photographs of glutamine-containing DOL:DME (1:1) solutions containing (a)  
18 10 mM glutamine and (b) 15 mM glutamine

19 **Figure S2.**  $\text{Li}^+$  diffusion coefficients determined after CV studies at various scan rates; (a)  
20 comparison of the  $\text{Li}^+$  diffusion coefficients for the reference cell and the glutamine cell with a  
21 bar-graph and (b) a table showing each  $\text{Li}^+$  diffusion coefficient at the C1, C2, and A3 peaks.

22

23

24

25

26

27

28

29

30

31

32

33

34

35

36

37

38

39

40

41

42

43

44

45

46

47

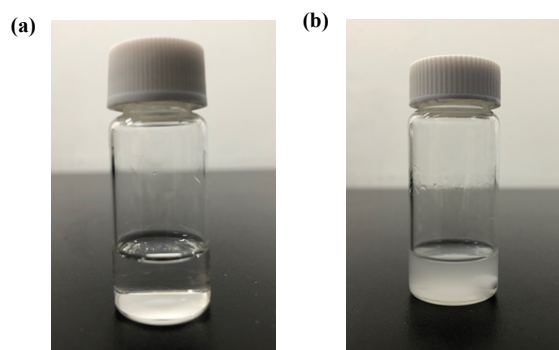

48 **Figure S1.** Optical photographs of glutamine-containing DOL:DME (1:1) solutions containing (a)

49 10 mM glutamine and (b) 15 mM glutamine

50

51

52

53

54

55

56

57

58

59

60

61

62

63

64

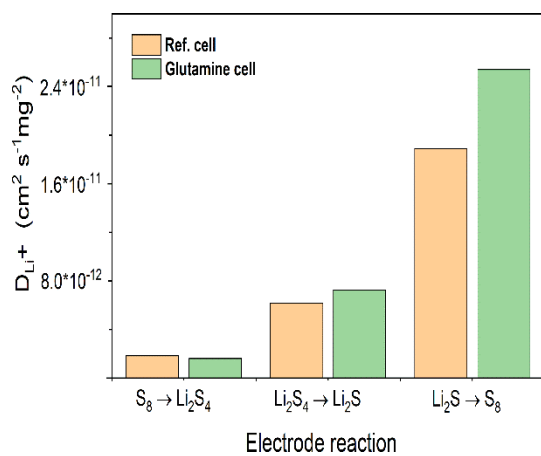

|            | Ref                    |                        |                        | Glutamine              |                        |                        |
|------------|------------------------|------------------------|------------------------|------------------------|------------------------|------------------------|
|            | C1                     | C2                     | A1                     | C1                     | C2                     | A1                     |
| slope      | -2.37                  | -4.36                  | 7.67                   | -2.233                 | -4.726                 | 8.864                  |
| $D_{Li^+}$ | $1.82 \times 10^{-12}$ | $6.16 \times 10^{-12}$ | $1.89 \times 10^{-11}$ | $1.61 \times 10^{-12}$ | $7.23 \times 10^{-12}$ | $2.54 \times 10^{-11}$ |

65

66 **Figure S2.**  $Li^+$  diffusion coefficients determined after CV studies at various scan rates; (a)  
67 comparison of the  $Li^+$  diffusion coefficients for the reference cell and the glutamine cell with a  
68 bar-graph and (b) a table showing each  $Li^+$  diffusion coefficient at the C1, C2, and A3 peaks.

69

70

71

72
